# Supplementary material for: Untargeted metabolomics profiling in pediatric patients and adult populations indicates a connection between lipid imbalance and epilepsy
Source: bioRxiv or medRxiv preprint supplement (doi:10.1101/2023.03.29.23287640), 2023-03-30
Supplement: Supplementary file [file media-2.pdf]

**Table S2.** Significant metabolic alterations in all cohorts and subgroups.

| Cohort                  | Subgroup                     | Sample size | Altered metabolite                                     | Average Z-score | BH corrected p-value |
|-------------------------|------------------------------|-------------|--------------------------------------------------------|-----------------|----------------------|
| PED-C                   | EP+ (n=11) vs<br>EP- (n=20)  | n=31        | 1-pentadecanoyl-2-arachidonoyl-GPC (15:0/20:4)*        | 1.1310          | 0.0007               |
|                         |                              |             | 1-stearoyl-2-docosapentaenoyl-GPC (18:0/22:5n6)*       | -0.2727         | 0.0023               |
|                         |                              |             | phosphatidylcholine (15:0/18:1, 17:0/16:1, 16:0/17:1)* | 1.4787          | 0.0024               |
|                         |                              |             | 1-pentadecanoyl-GPC (15:0)*                            | 0.5531          | 0.0050               |
|                         |                              |             | 1-myristoyl-GPC (14:0)                                 | 0.4751          | 0.0050               |
|                         |                              |             | Dimethylglycine                                        | -0.7356         | 0.0050               |
|                         |                              |             | 1-palmitoleoyl-GPC (16:1)*                             | 0.7933          | 0.0054               |
|                         |                              |             | 1-pentadecanoyl-2-docosahexaenoyl-GPC (15:0/22:6)*     | 1.6196          | 0.0059               |
|                         |                              |             | 1-stearyl-2-linoleoyl-GPC (O-18:0/18:2)*               | -0.4542         | 0.0068               |
|                         |                              |             | 1-myristoyl-2-arachidonoyl-GPC (14:0/20:4)*            | 1.0723          | 0.0068               |
|                         |                              |             | 2-myristoyl-GPC (14:0)*                                | 0.3968          | 0.0069               |
|                         |                              |             | 1-margaroyl-2-arachidonoyl-GPC (17:0/20:4)*            | 0.8468          | 0.0070               |
|                         |                              |             | 1-palmitoyl-2-palmitoleoyl-GPC (16:0/16:1)*            | 1.7798          | 0.0123               |
|                         |                              |             | 1-palmitoyl-2-eicosapentaenoyl-GPC (16:0/20:5)*        | 1.9384          | 0.0181               |
|                         |                              |             | 1-margaroyl-GPC (17:0)                                 | 0.0360          | 0.0211               |
|                         |                              |             | 1-myristoyl-2-palmitoyl-GPC (14:0/16:0)                | 1.1674          | 0.0218               |
|                         |                              |             | 1,2-dilinoleoyl-GPC (18:2/18:2)                        | -0.5755         | 0.0370               |
| eicosanedioate (C20-DC) | -0.6091                      | 0.0447      |                                                        |                 |                      |
| AD-C                    | EP+ (n=11) vs<br>EP- (n=239) | n=250       | C58:11 TAG                                             | -0.3627         | 0.0036               |
|                         |                              |             | C60:12 TAG                                             | -0.3568         | 0.0056               |
|                         |                              |             | C56:10 TAG                                             | -0.3521         | 0.0058               |
|                         |                              |             | C56:9 TAG                                              | -0.4438         | 0.0118               |
|                         |                              |             | C58:10 TAG                                             | -0.4803         | 0.0184               |
|                         |                              |             | C54:7 TAG                                              | -0.4905         | 0.0199               |
|                         |                              |             | C56:8 TAG                                              | -0.5078         | 0.0232               |
|                         |                              |             | C54:8 TAG                                              | -0.4496         | 0.0215               |
|                         |                              |             | C40:6 PE                                               | -0.5396         | 0.0303               |
| ELD-C                   | EP+ (n=26) vs<br>EP- (n=557) | n=583       | Hydrochlorothiazide                                    | -0.2145         | 0.0046               |

| Cohort       | Subgroup                                 | Sample size | Altered metabolite             | Average Z-score | BH corrected p-value |
|--------------|------------------------------------------|-------------|--------------------------------|-----------------|----------------------|
| ELD-C        | Dyslip+:<br>EP+ (n=9) vs<br>EP- (n=214)  | n=223       | C4-OH carnitine                | -0.5301         | 0.0151               |
|              |                                          |             | citrulline                     | -0.5002         | 0.0094               |
| ELD-C        | Dyslip-:<br>EP+ (n=17) vs<br>EP- (n=343) | n=360       | Chenodeoxycholate              | -0.4172         | 0.0007               |
|              |                                          |             | Deoxycholate                   | -0.4275         | 0.0009               |
|              |                                          |             | Cortisone                      | -0.2366         | 0.0121               |
|              |                                          |             | chenodeoxycholate/deoxycholate | -0.4248         | 0.0118               |
| ELD-C        | Prevalent (n=5)<br>vs EP- (n=557)        | n=562       | C43:2 TAG                      | -0.5683         | <0.001               |
|              |                                          |             | Hydrochlorothiazide            | -0.2589         | <0.001               |
|              |                                          |             | Cotinine                       | -0.2537         | <0.001               |
|              |                                          |             | Alpha-muricholate              | -0.3307         | <0.001               |
|              |                                          |             | C56:2 TAG                      | -0.5765         | 0.0081               |
|              |                                          |             | hydrocinnamic acid             | -0.6241         | 0.0088               |
|              |                                          |             | Thiamine                       | -0.1830         | 0.0114               |
|              |                                          |             | C45:2 TAG                      | -0.4572         | 0.0199               |
|              |                                          |             | C54:1 TAG                      | -0.5874         | 0.0359               |
|              |                                          |             | C54:9 TAG                      | -0.3403         | 0.0340               |
|              |                                          |             | Cortisone                      | -0.2309         | 0.0410               |
|              |                                          |             | 4-Guanidinobutanoic acid       | -0.1646         | 0.0404               |
|              |                                          |             | C56:3 TAG                      | -0.6919         | 0.0381               |
|              |                                          |             | C43:1 TAG                      | -0.4660         | 0.0395               |
|              |                                          |             | C55:2 TAG                      | -0.6870         | 0.0379               |
|              |                                          |             | anserine                       | -0.3865         | 0.0408               |
|              |                                          |             | C24:1 Ceramide (d18:1)         | -0.7127         | 0.0472               |
|              |                                          |             | C42:0 TAG                      | -0.3266         | 0.0473               |
| 4-pyridoxate | -0.2674                                  | 0.0452      |                                |                 |                      |
| C46:4 TAG    | -0.5776                                  | 0.0473      |                                |                 |                      |
| ELD-C        | Incident (n=21)<br>vs EP- (n=557)        | n=578       | C4-OH carnitine                | -0.4748         | 0.0026               |
|              |                                          |             | hydrochlorothiazide            | -0.5372         | 0.0023               |

| Cohort    | Subgroup                          | Sample size | Altered metabolite     | Average Z-score | BH corrected p-value |
|-----------|-----------------------------------|-------------|------------------------|-----------------|----------------------|
| AD-C      | Prevalent (n=7)<br>vs EP- (n=239) | n=246       | C60:12 TAG             | -0.4305         | <0.001               |
|           |                                   |             | C58:11 TAG             | -0.4370         | <0.001               |
|           |                                   |             | glycoursodeoxycholate  | -0.4493         | 0.0003               |
|           |                                   |             | glycolithocholate      | -0.5167         | 0.0036               |
|           |                                   |             | C58:10 TAG             | -0.5983         | 0.0048               |
|           |                                   |             | C36:5 PC plasmalogen-A | -0.6655         | 0.0040               |
|           |                                   |             | C56:9 TAG              | -0.5212         | 0.0052               |
|           |                                   |             | C54:7 TAG              | -0.5849         | 0.0087               |
|           |                                   |             | C56:8 TAG              | -0.6096         | 0.0146               |
|           |                                   |             | C40:6 PE               | -0.6403         | 0.0135               |
|           |                                   |             | C20:5 CE               | -0.8176         | 0.0126               |
|           |                                   |             | C56:10 TAG             | -0.3889         | 0.0160               |
|           |                                   |             | C34:0 PS               | -0.8800         | 0.0160               |
|           |                                   |             | C54:8 TAG              | -0.5116         | 0.0181               |
|           |                                   |             | C46:1 TAG              | -0.4315         | 0.0280               |
|           |                                   |             | C52:6 TAG              | -0.4780         | 0.0324               |
|           |                                   |             | C48:2 TAG              | -0.4852         | 0.0406               |
|           |                                   |             | C38:7 PE plasmalogen   | -0.9199         | 0.0409               |
|           |                                   |             | C34:2 DAG              | -0.4578         | 0.0408               |
|           |                                   |             | C52:7 TAG              | -0.4636         | 0.0443               |
|           |                                   |             | C38:6 PC               | -0.8980         | 0.0431               |
|           |                                   |             | succinate              | -0.6033         | 0.0463               |
|           |                                   |             | alanine                | -0.6846         | 0.0488               |
|           |                                   |             | C40:9 PC               | -1.0107         | 0.0468               |
|           |                                   |             | C58:9 TAG              | -0.5655         | 0.0469               |
|           |                                   |             | C40:6 PC               | -0.7433         | 0.0512               |
| C32:1 DAG | -0.4319                           | 0.0498      |                        |                 |                      |
| C50:4 TAG | -0.4954                           | 0.0487      |                        |                 |                      |

EP – epilepsy, Dyslip – dyslipidemia, Prevalent – epilepsy diagnosed before sample date, Incident – epilepsy diagnosed after sample date, GPC – glycerophospholipid, DC – dicarboxylic acid, TAG – Triacylglyceride, PE – phosphatidylethanolamine, PS – phosphatidylserine, PC – phosphatidylcholine, CE – cholesteryl ester, \* – the identification on metabolites marked with an asterisk is based on mass spectrometry data but no reference standards are currently available to verify the identity.
